# Supplementary material for: Low-cost valence-rich copper–iron–sulfur–oxygen porous nanocluster that drives an exceptional energy-saving carbohydrazide oxidization reaction in alkali and near-neutral electrolytes
Source: Royal Society of Chemistry journal article supplement (doi:10.1039/d0ta09295a), 2020-01-01
Supplement: d0ta09295a1.pdf [file d0ta09295a1.pdf]

## **Electronic Supplementary Information**

### **Low-cost valence-rich copper–iron–sulfur–oxygen porous nanocluster driving an exceptional energy-saving carbonyl oxidation reaction in alkali and near-neutral electrolyte**

Yanqing Wang<sup>a</sup>, Yuemeng Li<sup>b</sup>, Liping Ding<sup>a,\*</sup>, Yanfeng Tang<sup>a,\*</sup>, Jun Ding<sup>b,\*</sup>

<sup>a</sup> School of Chemistry and Chemical Engineering, Nantong University, Nantong 226007, China

<sup>b</sup> Department of Materials Science & Engineering, National University of Singapore, 117575,

Singapore

## **Experimental Section**

### **Materials**

Highly conductive Cu foam(CF) support was bought from Latech Scientific Supply Pte. Ltd.  $(\text{NH}_4)_2\text{Fe}_2\text{SO}_4 \cdot 6\text{H}_2\text{O}$ ,  $\text{Na}_2\text{S}_2\text{O}_3 \cdot 5\text{H}_2\text{O}$ , ethyl alcohol, KOH, and  $\text{H}_2\text{SO}_4$ (95-98wt%), carbohydrazide were purchased from Sigma-Aldrich Chemical Reagent Co.

### **Fabrication of Cu-Fe-S-O porous nanocluster (Cu-Fe-S-O PN) coating**

Cu-Fe-S-O porous nanocluster (Cu-Fe-S-O PN) coating was prepared as follows. In a typical synthesis, to remove the oil on the surface of CF, a piece of CF was immersed into ethyl alcohol at room temperature for 2 min. Then CF was dipped into 5 volume%  $\text{H}_2\text{SO}_4$  for 2min at room temperature to remove the copper oxide of the surface of CF. Finally, CF was immersed into wet chemical bath synthesis (CBS) solution for 4h at room temperature. The CBS solution contains 130g/L  $\text{Na}_2\text{S}_2\text{O}_3 \cdot 5\text{H}_2\text{O}$  and 35g/L  $(\text{NH}_4)_2\text{Fe}_2\text{SO}_4 \cdot 6\text{H}_2\text{O}$ . Notably, we used deionized water to clean CF for a few times among the above two processes to avoid the effect from the remain solution of every process. The mass loading of Cu-Fe-S-O PN catalyst is about  $0.85\text{mg}/\text{cm}^2$ .

### **Characterizations**

ZEISS SEM Supra 40 (attached EDS from Oxford Instrument) was employed to observe the microstructure of varied samples and test chemical composition of samples. XRD patterns were determined by Bruker D8 Advanced Diffractometer

System. The element analysis of surface layer of samples was investigated by X-ray photoelectron spectroscopy (XPS, Kratos AXIS Ultra DLD).

### **Electrochemical measurements**

The carbohydrazide oxidization reaction (COR) process was determined by using the typical three-electrode cell connected to a Bio-logic VMP 3. In this cell, the Cu-Fe-S-O PN coating/CF, Hg/HgO and Pt were employed as the working electrode (WE) ( $1 \times 1 \text{ cm}^2$ ), a reference electrode (RE) and a counter electrode (CE), respectively. The electrolyte solution contains 1M KOH and 0.5M carbohydrazide and the pH value of electrolyte is 14. According to the equation  $E(\text{RHE}) = E_{\text{Hg/HgO}} + 0.059\text{pH} + 0.098 \text{ V}$ , we convert all the measured potential values to reversible hydrogen electrodes (RHE) standard. LSV curves were measured with the scan rates of 1mV/s without special statement. Tafel slopes were calculated by analyzing LSV curves. Moreover, all the electrochemical datas in this paper were presented after 100% IR compensation without special statement.

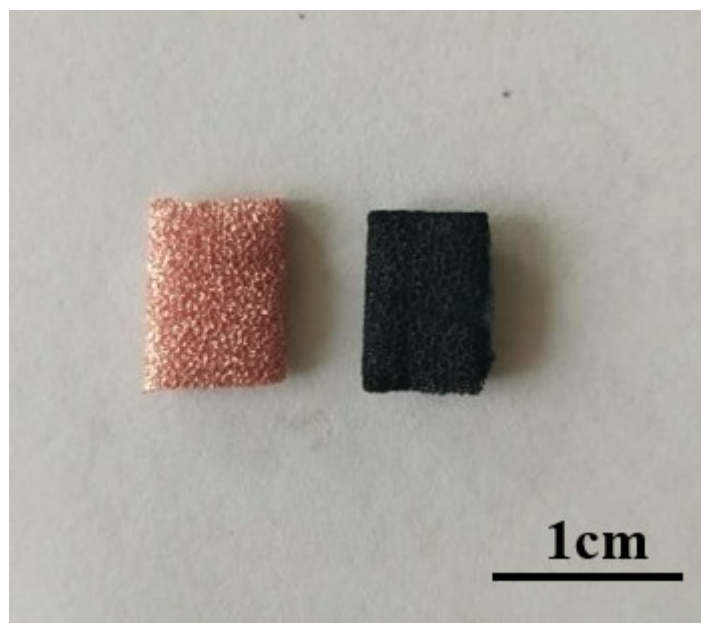

**Figure S1** the digital photos of Cu foam (left) and Cu-Fe-S-O PN coating (right)

**Table S1** The element atomic content of the surface layer of Cu-Fe-S-O PN coating by XPS analysis.

| <b>Element</b> | <b>Atomic/%</b> |
|----------------|-----------------|
| <b>Cu K</b>    | <b>25.5</b>     |
| <b>Fe K</b>    | <b>19.1</b>     |
| <b>S K</b>     | <b>1.4</b>      |
| <b>O K</b>     | <b>54.0</b>     |
| <b>Total</b>   | <b>100.00</b>   |

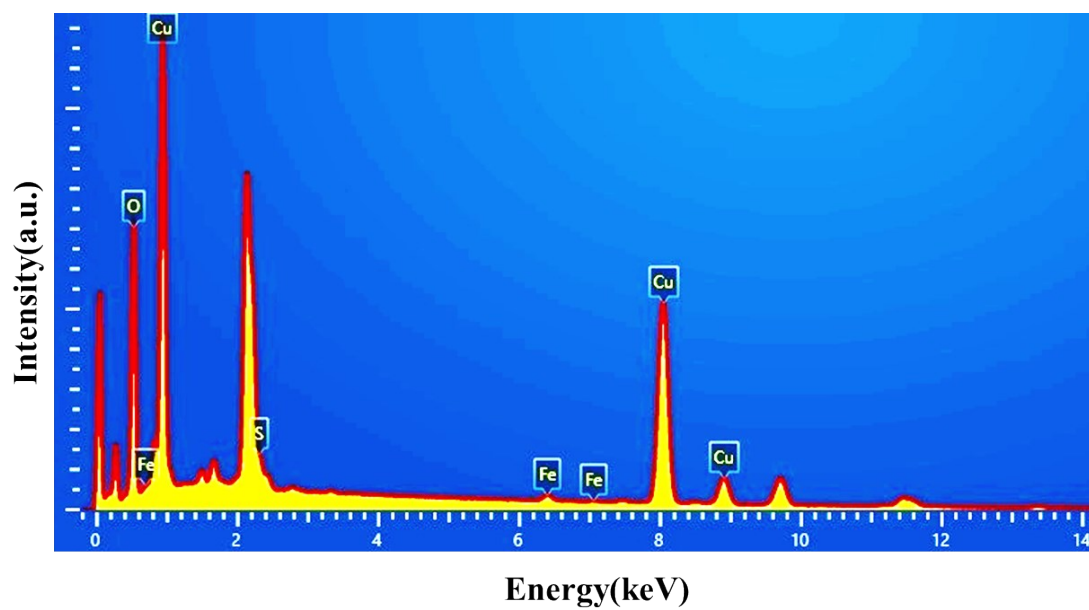

**Figure S2** The EDS test results of Cu-Fe-S-O PN coating

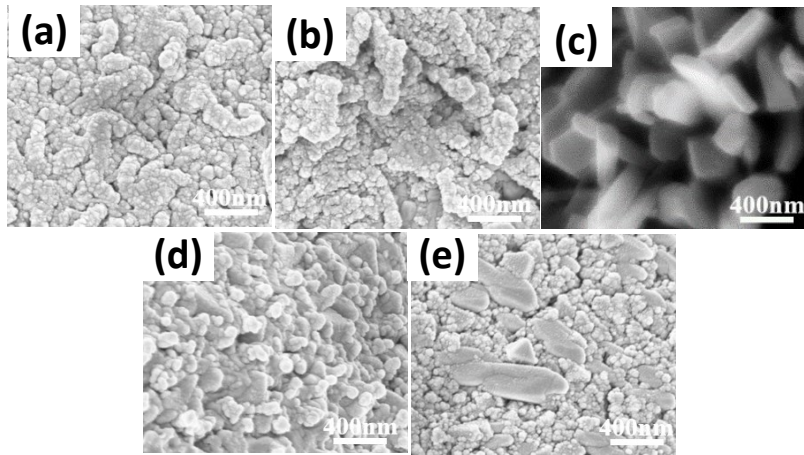

**Figure S3** The influence of different reaction time on the microstructure of Cu-Fe-S-O PN coating

(a) 1h (b) 2h (c) 4h (d) 8h (e) 16h

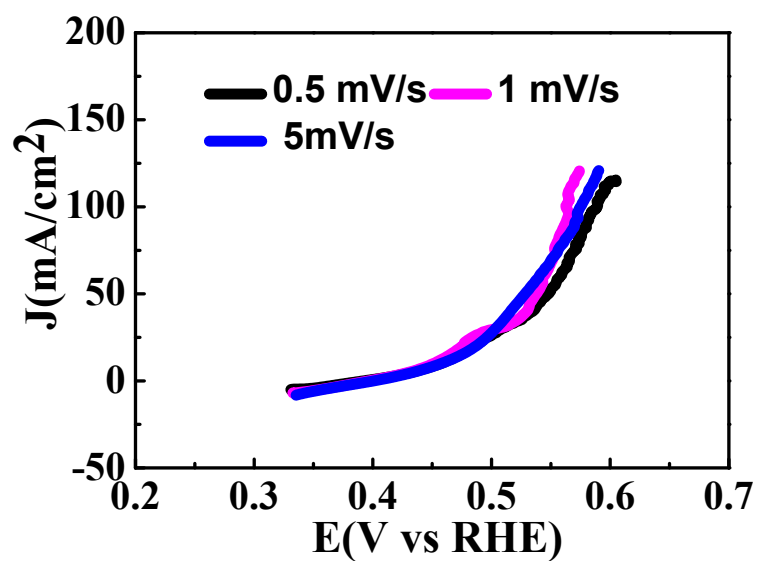

**Figure S4** LSV performance for COR of Cu-Fe-S-O PN coating under different scanning rates in alkali electrolyte



(a)

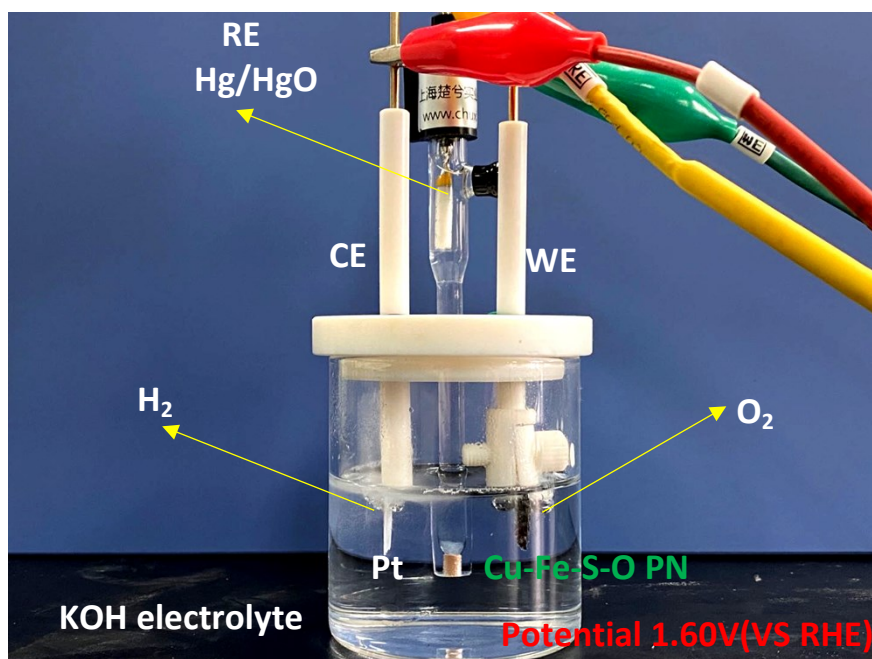

(b)

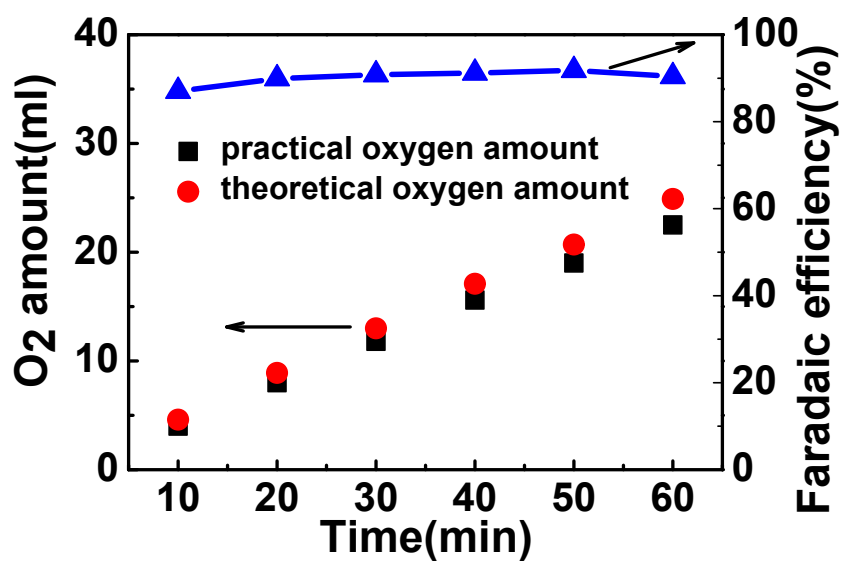

**Figure S5** The observation and calculation of faradaic efficiency of OER process (a) the experimental phenomenon scheme of three electrodes system for OER test at potential 1.60V(VS RHE) (b) the oxygen evolution amount and faradaic efficiency at about 100mA/cm<sup>2</sup> for different electrolysis time.

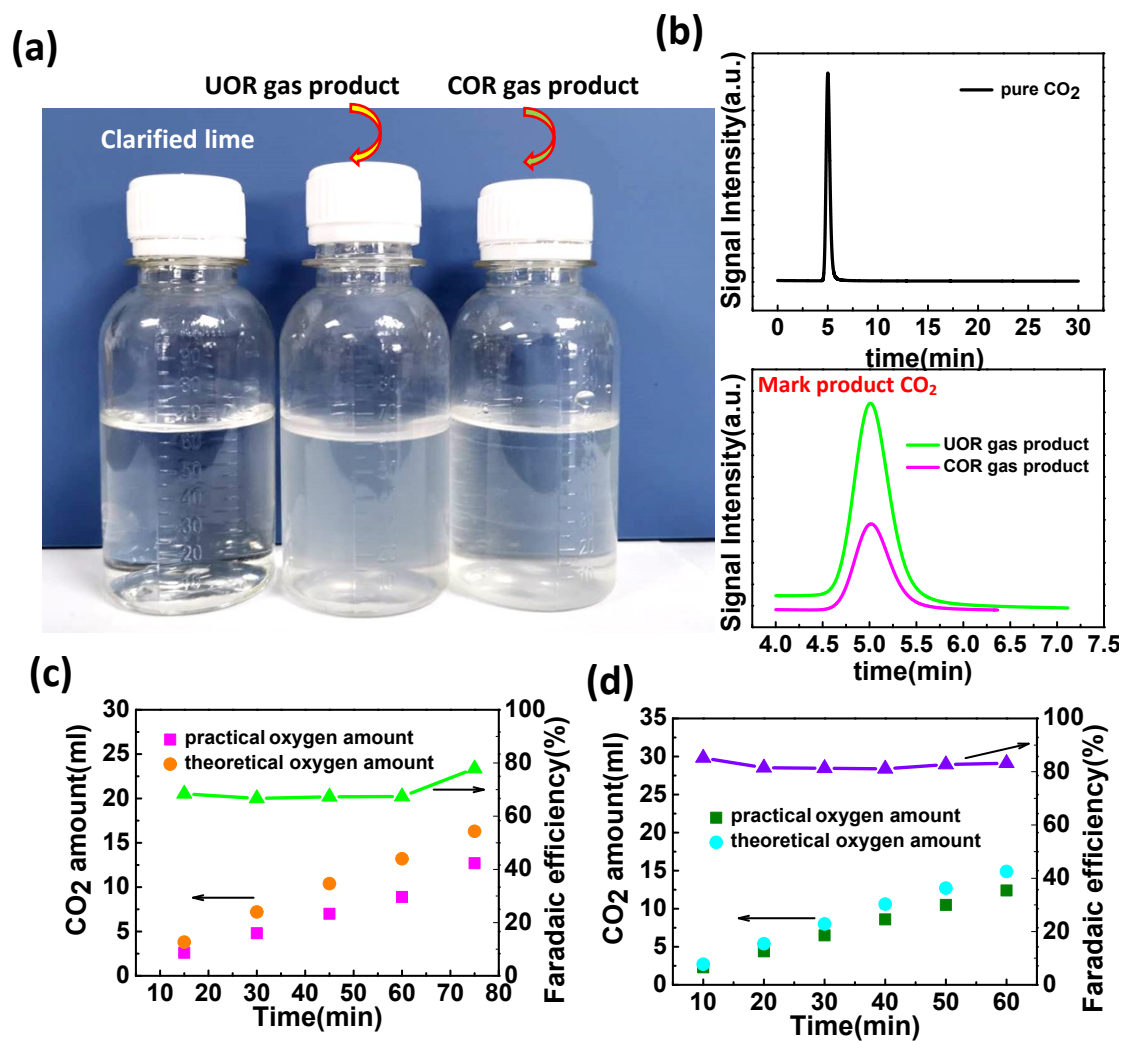

**Figure S6** The verification and calculation of faradaic efficiency of UOR and COR process (a) lime water experiment for detecting the mark product CO<sub>2</sub> of UOR and COR (b) Specific carbon dioxide gas chromatography (GC) experiment for detecting the mark product CO<sub>2</sub> of UOR and COR (c) the CO<sub>2</sub> amount and faradaic efficiency at about 100mA/cm<sup>2</sup> for different urea electrolysis time (d) the CO<sub>2</sub> amount and faradaic efficiency at about 100mA/cm<sup>2</sup> for different carbohydrazide electrolysis time

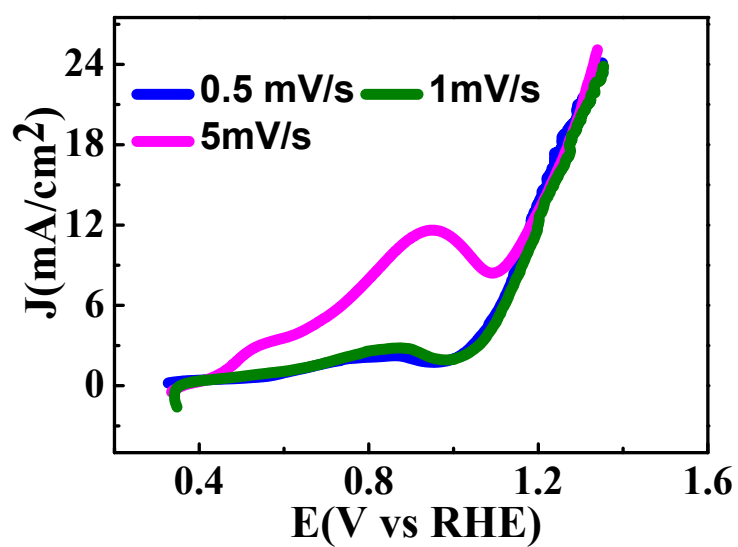

**Figure S7** LSV performance for COR of Cu-Fe-S-O PN coating under different scanning rates in near-neutral electrolyte

## Supplementary METHODS

### Calculation of electrochemically active surface area (*ECSA*)

The electrochemical double-layer capacitance  $C_{dl}$  of electrode is calculated according to the below equation:

$$C_{dl} = J_c \div v \quad (1)$$

The CV curves in the non-Faradaic capacitance current range are presented in **Fig 2e**.

The charge current  $J_c$  and the scan rate  $v$  can be obtained from **Fig 2f**.

After calculation, as shown in Fig 2f,  $C_{dl}$  value of Cu-Fe-S-O PN/CF electrode is 34.8mF.

The electrochemically active surface area *ECSA* of electrode is calculated as the below equation on the basis of the previous published articles:

$$ECSA = C_{dl} \div C_s \quad (2)$$

According to the as-reported literatures, the specific capacitance value of the sample

$C_s$  is 0.040 mF/cm<sup>2</sup>, as such, the *ECSA* of Cu-Fe-S-O PN/CF electrode is 870cm<sup>2</sup>.

**Table S2.** The comparison of the anode oxidization potential between Cu-Fe-S-O PN coating COR catalysis system and other environmental-friendly energy-saving electrolysis systems

| Catalyst                             | $j$<br>[mA<br>/cm <sup>2</sup><br>] | potential<br>(vs<br>RHE)[V<br>]<br>@ $j$ | Electrolyte composition                   | Ref                                              |                                      |     |       |                                           |                                                  |                                    |      |                                      |                     |                                              |                                           |                                                  |                                    |                                |                                              |                       |                                              |                                           |                                                  |                                           |                                |                                              |                       |                                              |                                    |                                               |                                           |                                |                                              |                       |                                              |                                    |                                              |                                           |                                |                                              |                       |                                              |                                    |                     |                                           |                                |                                              |                       |     |
|--------------------------------------|-------------------------------------|------------------------------------------|-------------------------------------------|--------------------------------------------------|--------------------------------------|-----|-------|-------------------------------------------|--------------------------------------------------|------------------------------------|------|--------------------------------------|---------------------|----------------------------------------------|-------------------------------------------|--------------------------------------------------|------------------------------------|--------------------------------|----------------------------------------------|-----------------------|----------------------------------------------|-------------------------------------------|--------------------------------------------------|-------------------------------------------|--------------------------------|----------------------------------------------|-----------------------|----------------------------------------------|------------------------------------|-----------------------------------------------|-------------------------------------------|--------------------------------|----------------------------------------------|-----------------------|----------------------------------------------|------------------------------------|----------------------------------------------|-------------------------------------------|--------------------------------|----------------------------------------------|-----------------------|----------------------------------------------|------------------------------------|---------------------|-------------------------------------------|--------------------------------|----------------------------------------------|-----------------------|-----|
| Cu-Fe-S-O PN                         | 10                                  | 0.45                                     | 1MKOH<br>+0.5M carbohydrazide             | This work                                        |                                      |     |       |                                           |                                                  |                                    |      |                                      |                     |                                              |                                           |                                                  |                                    |                                |                                              |                       |                                              |                                           |                                                  |                                           |                                |                                              |                       |                                              |                                    |                                               |                                           |                                |                                              |                       |                                              |                                    |                                              |                                           |                                |                                              |                       |                                              |                                    |                     |                                           |                                |                                              |                       |     |
|                                      | 100                                 | 0.56                                     |                                           |                                                  | Ni <sub>2</sub> P NPA/NF             | 10  | 1.35  | 1MKOH<br>+10mM HMF                        | <i>Angew. Chem.</i> 2016, 128,<br>1              | 100                                | 1.38 | Co <sub>3</sub> O <sub>4</sub> NS/CP | 10                  | 1.445                                        | 1MKOH<br>+1M ethanol                      | <i>ACS Cent. Sci.</i> 2016, 2, 8,<br>538         | 100                                | 1.59                           | Co <sub>3</sub> FeP <sub>x</sub> @NF         | 10                    | 1.24                                         | 1MKOH<br>+0.1M carbohydrate<br>substrates | <i>Appl Catal B-Environ,</i><br>2020,263, 118109 | 100                                       | 1.36                           | CoS <sub>2</sub> -MoS <sub>2</sub>           | 10                    | 1.29                                         | 1MKOH+0.5Murea                     | <i>Adv. Energy Mater.</i> 2018,<br>8, 1801775 | 100                                       | 1.33                           | Ni <sub>3</sub> S <sub>2</sub> /NF           | 100                   | 1.40                                         | 1MKOH+10mM benzyl<br>alcohol       | <i>J. Am. Chem. Soc.</i> 2016,<br>138, 13639 | Ni <sub>3</sub> S <sub>2</sub> /NF        | 100                            | 1.41                                         | 1MKOH+10mM furfural   | <i>J. Am. Chem. Soc.</i> 2016,<br>138, 13639 | Ni <sub>3</sub> S <sub>2</sub> /NF | 100                 | 1.40                                      | 1MKOH+10mM furfuryl<br>alcohol | <i>J. Am. Chem. Soc.</i> 2016,<br>138, 13639 | Fe <sub>2</sub> P/SSM | 100 |
| Ni <sub>2</sub> P NPA/NF             | 10                                  | 1.35                                     | 1MKOH<br>+10mM HMF                        | <i>Angew. Chem.</i> 2016, 128,<br>1              |                                      |     |       |                                           |                                                  |                                    |      |                                      |                     |                                              |                                           |                                                  |                                    |                                |                                              |                       |                                              |                                           |                                                  |                                           |                                |                                              |                       |                                              |                                    |                                               |                                           |                                |                                              |                       |                                              |                                    |                                              |                                           |                                |                                              |                       |                                              |                                    |                     |                                           |                                |                                              |                       |     |
|                                      | 100                                 | 1.38                                     |                                           |                                                  | Co <sub>3</sub> O <sub>4</sub> NS/CP | 10  | 1.445 | 1MKOH<br>+1M ethanol                      | <i>ACS Cent. Sci.</i> 2016, 2, 8,<br>538         | 100                                | 1.59 | Co <sub>3</sub> FeP <sub>x</sub> @NF | 10                  | 1.24                                         | 1MKOH<br>+0.1M carbohydrate<br>substrates | <i>Appl Catal B-Environ,</i><br>2020,263, 118109 | 100                                | 1.36                           | CoS <sub>2</sub> -MoS <sub>2</sub>           | 10                    | 1.29                                         | 1MKOH+0.5Murea                            | <i>Adv. Energy Mater.</i> 2018,<br>8, 1801775    | 100                                       | 1.33                           | Ni <sub>3</sub> S <sub>2</sub> /NF           | 100                   | 1.40                                         | 1MKOH+10mM benzyl<br>alcohol       | <i>J. Am. Chem. Soc.</i> 2016,<br>138, 13639  | Ni <sub>3</sub> S <sub>2</sub> /NF        | 100                            | 1.41                                         | 1MKOH+10mM furfural   | <i>J. Am. Chem. Soc.</i> 2016,<br>138, 13639 | Ni <sub>3</sub> S <sub>2</sub> /NF | 100                                          | 1.40                                      | 1MKOH+10mM furfuryl<br>alcohol | <i>J. Am. Chem. Soc.</i> 2016,<br>138, 13639 | Fe <sub>2</sub> P/SSM | 100                                          | 1.39                               | 10MKOH+0.5M glucose | <i>Electrochem Commun,</i><br>2017,83, 11 |                                |                                              |                       |     |
| Co <sub>3</sub> O <sub>4</sub> NS/CP | 10                                  | 1.445                                    | 1MKOH<br>+1M ethanol                      | <i>ACS Cent. Sci.</i> 2016, 2, 8,<br>538         |                                      |     |       |                                           |                                                  |                                    |      |                                      |                     |                                              |                                           |                                                  |                                    |                                |                                              |                       |                                              |                                           |                                                  |                                           |                                |                                              |                       |                                              |                                    |                                               |                                           |                                |                                              |                       |                                              |                                    |                                              |                                           |                                |                                              |                       |                                              |                                    |                     |                                           |                                |                                              |                       |     |
|                                      | 100                                 | 1.59                                     |                                           |                                                  | Co <sub>3</sub> FeP <sub>x</sub> @NF | 10  | 1.24  | 1MKOH<br>+0.1M carbohydrate<br>substrates | <i>Appl Catal B-Environ,</i><br>2020,263, 118109 | 100                                | 1.36 | CoS <sub>2</sub> -MoS <sub>2</sub>   | 10                  | 1.29                                         | 1MKOH+0.5Murea                            | <i>Adv. Energy Mater.</i> 2018,<br>8, 1801775    | 100                                | 1.33                           | Ni <sub>3</sub> S <sub>2</sub> /NF           | 100                   | 1.40                                         | 1MKOH+10mM benzyl<br>alcohol              | <i>J. Am. Chem. Soc.</i> 2016,<br>138, 13639     | Ni <sub>3</sub> S <sub>2</sub> /NF        | 100                            | 1.41                                         | 1MKOH+10mM furfural   | <i>J. Am. Chem. Soc.</i> 2016,<br>138, 13639 | Ni <sub>3</sub> S <sub>2</sub> /NF | 100                                           | 1.40                                      | 1MKOH+10mM furfuryl<br>alcohol | <i>J. Am. Chem. Soc.</i> 2016,<br>138, 13639 | Fe <sub>2</sub> P/SSM | 100                                          | 1.39                               | 10MKOH+0.5M glucose                          | <i>Electrochem Commun,</i><br>2017,83, 11 |                                |                                              |                       |                                              |                                    |                     |                                           |                                |                                              |                       |     |
| Co <sub>3</sub> FeP <sub>x</sub> @NF | 10                                  | 1.24                                     | 1MKOH<br>+0.1M carbohydrate<br>substrates | <i>Appl Catal B-Environ,</i><br>2020,263, 118109 |                                      |     |       |                                           |                                                  |                                    |      |                                      |                     |                                              |                                           |                                                  |                                    |                                |                                              |                       |                                              |                                           |                                                  |                                           |                                |                                              |                       |                                              |                                    |                                               |                                           |                                |                                              |                       |                                              |                                    |                                              |                                           |                                |                                              |                       |                                              |                                    |                     |                                           |                                |                                              |                       |     |
|                                      | 100                                 | 1.36                                     |                                           |                                                  | CoS <sub>2</sub> -MoS <sub>2</sub>   | 10  | 1.29  | 1MKOH+0.5Murea                            | <i>Adv. Energy Mater.</i> 2018,<br>8, 1801775    | 100                                | 1.33 | Ni <sub>3</sub> S <sub>2</sub> /NF   | 100                 | 1.40                                         | 1MKOH+10mM benzyl<br>alcohol              | <i>J. Am. Chem. Soc.</i> 2016,<br>138, 13639     | Ni <sub>3</sub> S <sub>2</sub> /NF | 100                            | 1.41                                         | 1MKOH+10mM furfural   | <i>J. Am. Chem. Soc.</i> 2016,<br>138, 13639 | Ni <sub>3</sub> S <sub>2</sub> /NF        | 100                                              | 1.40                                      | 1MKOH+10mM furfuryl<br>alcohol | <i>J. Am. Chem. Soc.</i> 2016,<br>138, 13639 | Fe <sub>2</sub> P/SSM | 100                                          | 1.39                               | 10MKOH+0.5M glucose                           | <i>Electrochem Commun,</i><br>2017,83, 11 |                                |                                              |                       |                                              |                                    |                                              |                                           |                                |                                              |                       |                                              |                                    |                     |                                           |                                |                                              |                       |     |
| CoS <sub>2</sub> -MoS <sub>2</sub>   | 10                                  | 1.29                                     | 1MKOH+0.5Murea                            | <i>Adv. Energy Mater.</i> 2018,<br>8, 1801775    |                                      |     |       |                                           |                                                  |                                    |      |                                      |                     |                                              |                                           |                                                  |                                    |                                |                                              |                       |                                              |                                           |                                                  |                                           |                                |                                              |                       |                                              |                                    |                                               |                                           |                                |                                              |                       |                                              |                                    |                                              |                                           |                                |                                              |                       |                                              |                                    |                     |                                           |                                |                                              |                       |     |
|                                      | 100                                 | 1.33                                     |                                           |                                                  | Ni <sub>3</sub> S <sub>2</sub> /NF   | 100 | 1.40  | 1MKOH+10mM benzyl<br>alcohol              | <i>J. Am. Chem. Soc.</i> 2016,<br>138, 13639     | Ni <sub>3</sub> S <sub>2</sub> /NF | 100  | 1.41                                 | 1MKOH+10mM furfural | <i>J. Am. Chem. Soc.</i> 2016,<br>138, 13639 | Ni <sub>3</sub> S <sub>2</sub> /NF        | 100                                              | 1.40                               | 1MKOH+10mM furfuryl<br>alcohol | <i>J. Am. Chem. Soc.</i> 2016,<br>138, 13639 | Fe <sub>2</sub> P/SSM | 100                                          | 1.39                                      | 10MKOH+0.5M glucose                              | <i>Electrochem Commun,</i><br>2017,83, 11 |                                |                                              |                       |                                              |                                    |                                               |                                           |                                |                                              |                       |                                              |                                    |                                              |                                           |                                |                                              |                       |                                              |                                    |                     |                                           |                                |                                              |                       |     |
| Ni <sub>3</sub> S <sub>2</sub> /NF   | 100                                 | 1.40                                     | 1MKOH+10mM benzyl<br>alcohol              | <i>J. Am. Chem. Soc.</i> 2016,<br>138, 13639     |                                      |     |       |                                           |                                                  |                                    |      |                                      |                     |                                              |                                           |                                                  |                                    |                                |                                              |                       |                                              |                                           |                                                  |                                           |                                |                                              |                       |                                              |                                    |                                               |                                           |                                |                                              |                       |                                              |                                    |                                              |                                           |                                |                                              |                       |                                              |                                    |                     |                                           |                                |                                              |                       |     |
| Ni <sub>3</sub> S <sub>2</sub> /NF   | 100                                 | 1.41                                     | 1MKOH+10mM furfural                       | <i>J. Am. Chem. Soc.</i> 2016,<br>138, 13639     |                                      |     |       |                                           |                                                  |                                    |      |                                      |                     |                                              |                                           |                                                  |                                    |                                |                                              |                       |                                              |                                           |                                                  |                                           |                                |                                              |                       |                                              |                                    |                                               |                                           |                                |                                              |                       |                                              |                                    |                                              |                                           |                                |                                              |                       |                                              |                                    |                     |                                           |                                |                                              |                       |     |
| Ni <sub>3</sub> S <sub>2</sub> /NF   | 100                                 | 1.40                                     | 1MKOH+10mM furfuryl<br>alcohol            | <i>J. Am. Chem. Soc.</i> 2016,<br>138, 13639     |                                      |     |       |                                           |                                                  |                                    |      |                                      |                     |                                              |                                           |                                                  |                                    |                                |                                              |                       |                                              |                                           |                                                  |                                           |                                |                                              |                       |                                              |                                    |                                               |                                           |                                |                                              |                       |                                              |                                    |                                              |                                           |                                |                                              |                       |                                              |                                    |                     |                                           |                                |                                              |                       |     |
| Fe <sub>2</sub> P/SSM                | 100                                 | 1.39                                     | 10MKOH+0.5M glucose                       | <i>Electrochem Commun,</i><br>2017,83, 11        |                                      |     |       |                                           |                                                  |                                    |      |                                      |                     |                                              |                                           |                                                  |                                    |                                |                                              |                       |                                              |                                           |                                                  |                                           |                                |                                              |                       |                                              |                                    |                                               |                                           |                                |                                              |                       |                                              |                                    |                                              |                                           |                                |                                              |                       |                                              |                                    |                     |                                           |                                |                                              |                       |     |

**Table S3.** The comparison of the anode oxidization potential between Cu-Fe-S-O PN coating COR catalysis system and other reported highly efficient catalysts in neutral or near-neutral electrolyte

| Catalyst                     | $j$<br>[mA<br>/cm <sup>2</sup><br>] | potential<br>(vs<br>RHE)[V<br>@ $j$ ] | Electrolyte composition                    | Ref                                                          |
|------------------------------|-------------------------------------|---------------------------------------|--------------------------------------------|--------------------------------------------------------------|
| Cu-Fe-S-O PN                 | 10                                  | 1.01                                  | 0.1M sodium borate<br>+0.5M carbohydrazide | This work                                                    |
| Ni(S0.5Se0.5)2               | 10                                  | 1.731                                 | 1MPBS                                      | <i>J. Mater. Chem. A</i> , 2019,<br>7, 16793                 |
| Li-IrSe2                     | 10                                  | 1.545                                 | 1MPBS                                      | <i>Angew. Chem. Int. Ed.</i><br>2019, 58, 14764.             |
| v-NiFe LDH                   | 10                                  | 1.50                                  | 1MPBS                                      | <i>ACS Energy Lett.</i> 2019,<br>4, 1412                     |
| CoFe-<br>Bi@CoFe-LDH<br>NA/M | 10                                  | 1.648                                 | 0.1M K-Bi                                  | <i>ACS Sustainable Chem.</i><br><i>Eng.</i> 2018, 6, 2, 1527 |
| Ni3N@Ni-Bi<br>NS/Ti          | 10                                  | 1.635                                 | 0.1M K-Bi                                  | <i>J. Mater. Chem. A</i> ,<br>2017,5, 7806                   |
| NiCo2Te4/PTC<br>DA           | 10                                  | 1.35                                  | 1MPBS                                      | <i>Appl Catal B-Environ</i><br>2019,254, 424                 |
| CoO/Co4N/NF                  | 10                                  | 1.628                                 | 1MPBS                                      | <i>J. Mater. Chem. A</i> , 2018,<br>6,24767                  |
| Co-Bi-Pi@CoP                 | 10                                  | 1.64                                  | 0.1MK-Bi                                   | <i>ChemSusChem</i> 2017, 10,<br>1370.                        |
| CoP                          | 10                                  | 1.336                                 | 1MPBS                                      | <i>J. Am. Chem. Soc.</i> 2014,<br>136, 21, 7587              |
| NiFe HCH                     | 10                                  | 1.619                                 | 1MNaHCO3                                   | <i>Inorg. Chem.</i> 2019, 58,<br>1895                        |
| CoO/CoSe2                    | 10                                  | 1.567                                 | 0.5MPBS                                    | <i>Adv. Sci.</i> , 3: 1500426                                |
| MoS2@CoO                     | 10                                  | 1.555                                 | 1MPBS                                      | <i>J. Phys. Chem. C</i> 2019,<br>123, 5833                   |
| δMnO2/FTO                    | 10                                  | 1.83                                  | 0.5MNa2SO4                                 | <i>J. Am. Chem. Soc.</i><br>2012, 134, 1519.                 |
| Ni-Bi/RGO                    | 10                                  | 1.582                                 | 0.1MK-Bi                                   | <i>ChemCatChem</i><br>2018, 10, 2826.                        |
| Mn-Co-Bi/CC                  | 10                                  | 1.596                                 | 0.5MK-Bi                                   | <i>J. Mater. Chem. A</i> 2017,<br>5, 12091.                  |

**Table S4.** The comparison of the anode oxidization potential between Cu-Fe-S-O PN coating COR catalysis system and other reported Cu-based or Fe-based catalysts in neutral or near-neutral electrolyte

| Catalyst                                                  | $j$<br>[mA<br>/cm <sup>2</sup><br>] | potential<br>(vs<br>RHE)[V<br>]<br>@ $j$ | Electrolyte composition                                                          | Ref                                                       |
|-----------------------------------------------------------|-------------------------------------|------------------------------------------|----------------------------------------------------------------------------------|-----------------------------------------------------------|
| Cu-Fe-S-O PN                                              | 10                                  | 1.01                                     | 0.1M sodium borate<br>+0.5M carbohydrazide                                       | This work                                                 |
| Fe (II)-acetate<br>buffer                                 | 1                                   | 1.71                                     | 0.1M acetate<br>buffer solution                                                  | <i>Angew. Chem., Int. Ed.</i><br>2015,54, 4870.           |
| Fe-Ci                                                     | 10                                  | 1.79                                     | 0.2 M HCO <sub>3</sub> <sup>-</sup> /CO <sub>3</sub> <sup>2-</sup> -<br>solution | <i>Chem. Commun.</i> 2016,<br>52, 5753.                   |
| N-Fe <sub>2</sub> PO <sub>5-x</sub>                       | 10                                  | 1.545                                    | 1MPBS                                                                            | <i>Adv. Funct.</i><br><i>Mater.</i> 2018, 28,<br>1801397. |
| Iron<br>oxyhydroxide<br>thin films (A-<br>Fe)             | 1                                   | 1.72                                     | 0.5 M borate buffer                                                              | <i>J. Mater. Chem. A</i> 2016,<br>4, 3655.                |
| FeOOH<br>nanorods                                         | 0.88                                | 1.52                                     | 0.1M Na <sub>2</sub> SO <sub>4</sub>                                             | <i>Nanoscale</i> 2017, 9, 4751.                           |
| Fe-Pi-Bi/CC                                               | 10                                  | 1.664                                    | 0.1MK-Bi                                                                         | <i>Inorg. Chem.</i> 2017, 56,<br>3131.                    |
| Cu <sub>4</sub> O <sub>4</sub> core<br>complex            | 10                                  | 1.96                                     | 0.1MPBS                                                                          | <i>Dalton Trans.</i> 2016, 45,<br>12685.                  |
| [Cu <sub>2</sub> (BPMAN)(<br>m-OH)] <sup>3+</sup>         | 10                                  | 2.03                                     | 1MNaHCO <sub>3</sub>                                                             | <i>Angew. Chem., Int. Ed.</i><br>2015, 54, 4909.          |
| Cu(II)-CO <sub>3</sub> <sup>2-</sup>                      | 23                                  | 1.68                                     | 1M Na <sub>2</sub> CO <sub>3</sub>                                               | <i>Angew. Chem.</i> 2013, 125,<br>728.                    |
| 1D<br>heterogeneous<br>Cu (II)<br>coordination<br>polymer | 1                                   | 1.793                                    | 0.1MK-Bi                                                                         | <i>ChemElectroChem</i> 2017,<br>4, 75.                    |
| Cu/CuO                                                    | 1                                   | 1.715                                    | 1M Na <sub>2</sub> CO <sub>3</sub>                                               | <i>Angew. Chem., Int. Ed.</i><br>2015, 54, 2073.          |
| Cu <sub>2</sub> Se-<br>Cu <sub>2</sub> O/TF               | 10                                  | 1.695                                    | 0.2 M carbonate<br>buffer                                                        | <i>Chem. Commun.</i> 2018,<br>54, 4979.                   |

## REFERENCES

1. B. You, N. Jiang, X. Liu and Y. Sun, *Angew. Chem.*, 2016, **128**, 1-6
2. L. Dai, Q. Qin, X. Zhao, C. Xu, C. Hu, S. Mo, Y. O. Wang, S. Lin, Z. Tang and N. Zheng, *ACS Cent. Sci.* 2016, **2**, 538.
3. J. Miao, X. Teng, R. Zhang, P. Guo, Y. Chen, X. Zhou, H. Wang, X. Sun and L. Zhang, *Appl Catal B-Environ*, 2020, **263**, 118109
4. B. You, X. Liu, N. Jiang and Y. Sun, *J. Am. Chem. Soc.*, 2016, **138**, 13639
5. P. Du, J. Zhang, Y. Liu and M. Huang, *Electrochem Commun*, 2017, **83**, 11.
6. C. C. Li, Y. W. Liu, Z. W. Zhuo, H. X. Ju, D Li, Y. P. Guo, X. J. Wu, H. Q. Li and T. Y. Zhai, *Adv. Energy Mater.*, 2018, **8**, 1801775.
7. T. Zheng, C. Shang, Z. He, X. Wang, C. Cao, H. Li, R. Si, B. Pan, S. Zhou and J. Zeng, *Angew. Chem. Int. Ed.*, 2019, **58**, 14764.
8. L. Zeng, K. Sun, Y. Chen, Z. Liu, Y. Chen, Y. Pan, R. Zhao, Y. Liu and C. Liu, *J. Mater. Chem. A*, 2019, **7**, 16793
9. C. You, Y. Ji, Z. Liu, X. Xiong, and X. Sun, *ACS Sustainable Chem. Eng.*, 2018, **6**, 1527
10. L. Xie, F. Qu, Z. Liu, X. Ren, S. Hao, R. Ge, G. Du, A. M. Asiri, X. Sun and L. Chen, *J. Mater. Chem. A*, 2017, **5**, 7806
11. L. Tao, M. Huang, S. Guo, Q. Wang, M. Li, X. Xiao, G. Cao, Y. Shao, Y. Shen, Y. Fu and M. Wang, *Appl Catal B-Environ*, 2019, **254**, 424
12. R.-Q. Li, P. Hu, M. Miao, Y. Li, X. -F. Jiang, Q. Wu, Z. Meng, Z. Hu, Y. Bando and X.-B. Wang, *J. Mater. Chem. A*, 2018, **6**, 24767.
13. L. Cui, F. Qu, J. Liu, G. Du, A. M. Asiri and X. Sun, *ChemSusChem*, 2017, **10**, 1370.
14. J. Tian, Q. Liu, A. M. Asiri and X. Sun, *J. Am. Chem. Soc.*, 2014, **136**, 7587.
15. K. Karthick, S. Anantharaj, S. R. Ede and Subrata Kundu, *Inorg. Chem.*, 2019, **58**, 1895
16. K. Li, J. Zhang, R. Wu, Y. Yu and B. Zhang, *Adv. Sci.*, **3**, 1500426.
17. P. Cheng, C. Yuan, C. Yuan, Q. Zhou, X. Hu, J. Li, X. Lin, X. Wang, M. Jin, L. Shui, X. Gao, R. Nötzel, G. Zhou, Z. Zhang and J. Liu, *J. Phys. Chem. C*, 2019,



**123**, 5833

18. T. Takashima, K. Hashimoto and R. Nakamura, *J. Am. Chem. Soc.*, 2012, **134**, 1519.
19. X. Cao, L. Cui, X. Wang, W. Yang and J. Liu, *ChemCatChem*, 2018, **10**, 2826.
20. S. Hao and Y. Yang, *J. Mater. Chem. A*, 2017, **5**, 12091.
21. Y. Wu, M. Chen, Y. Han, H. Luo, X. Su, M.-T. Zhang, X. Lin, J. Sun, L. Wang, L. Deng, W. Zhang and R. Cao, *Angew. Chem., Int. Ed.*, 2015, **54**, 4870.
22. F. Li, L. Bai, H. Li, Y. Wang, F. Yu and L. Sun, *Chem. Commun.*, 2016, **52**, 5753.
23. Y. Wu, Y. Meng, J. Hou, S. Cao, Z. Gao, Z. Wu and L. Sun, *Adv. Funct. Mater.*, 2018, **28**, 1801397.
24. D. R. Chowdhury, L. Spiccia, S. S. Amritphale, A. Paul and A. Singh, *J. Mater. Chem. A*, 2016, **4**, 3655.
25. G. Park, Y. -I. Kim, Y. H. Kim, M. Park, K. Y. Jang, H. Song and K. M. Nam, *Nanoscale*, 2017, **9**, 4751.
26. W. Wang, D. Liu, S. Hao, F. Qu, Y. Ma, G. Du, A. M. Asiri, Y. Yao and X. Sun, *Inorg. Chem.*, 2017, **56**, 3131.
27. T. -T. Li and Y. -Q. Zheng, *Dalton Trans.*, 2016, **45**, 12685.
28. X. -J. Su, M. Gao, L. Jiao, R. Z. Liao, P. E. M. Siegbahn, J.-P. Cheng and M. -T. Zhang, *Angew. Chem. Int. Ed.*, 2015, **54**, 4909
29. R. Mishra, E. Ülker and F. Karadas, *ChemElectroChem*, 2017, **4**, 75.
30. J. Du, Z. Chen, S. Ye, B. J. Wiley and T. J. Meyer, *Angew. Chem. Int. Ed.*, 2015, **54**, 2073
31. H. Chen, Y. Gao, L. Ye, Y. Yao, X. Chen, Y. Wei and L. Sun, *Chem. Commun.*, 2018, **54**, 4979.
32. Z. Chen and T. J. Meyer, *Angew. Chem*, 2013, **125**, 728.
